# Supplementary material for: Synthesis and electrochemical performance of NaV6O15 microflowers for lithium and sodium ion batteries
Source: Royal Society of Chemistry journal article supplement (doi:10.1039/c7ra04388k), 2017-01-01
Supplement: c7ra04388k1.pdf [file c7ra04388k1.pdf]

## Synthesis and Electrochemical performance of $\text{NaV}_6\text{O}_{15}$ microflowers for lithium and sodium ion batteries

Fang Hu<sup>a</sup>, Wei Jiang<sup>a</sup>, Yidi Dong<sup>a</sup>, Xiaoyong Lai<sup>b</sup>, Li Xiao<sup>a</sup>, Xiang Wu<sup>a,\*</sup>

<sup>a</sup>School of Materials Science and Engineering, Shenyang University of Technology,

Shenyang 110870, P. R. China

<sup>b</sup>State Key Laboratory of High-efficiency Utilization of Coal and Green Chemical

Engineering, College of Chemistry and Chemical Engineering, Ningxia University,

Yinchuan 750021, P. R. China

\*correspondences should be addressed: wuxiang05@163.com, wuxiang05@sut.edu.cn

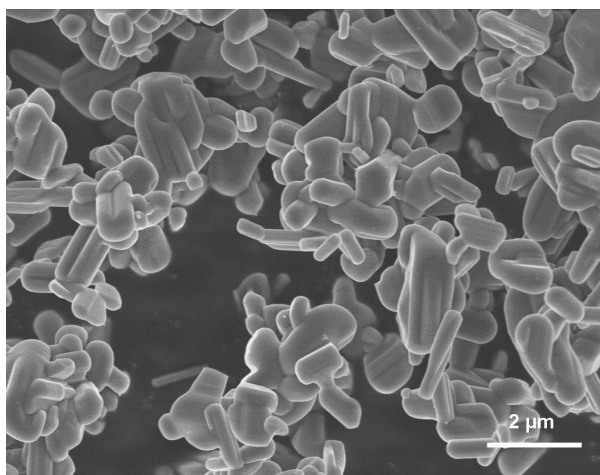

Fig. S1 SEM of  $\text{NaV}_6\text{O}_{15}$  powders calcined at 500 °C

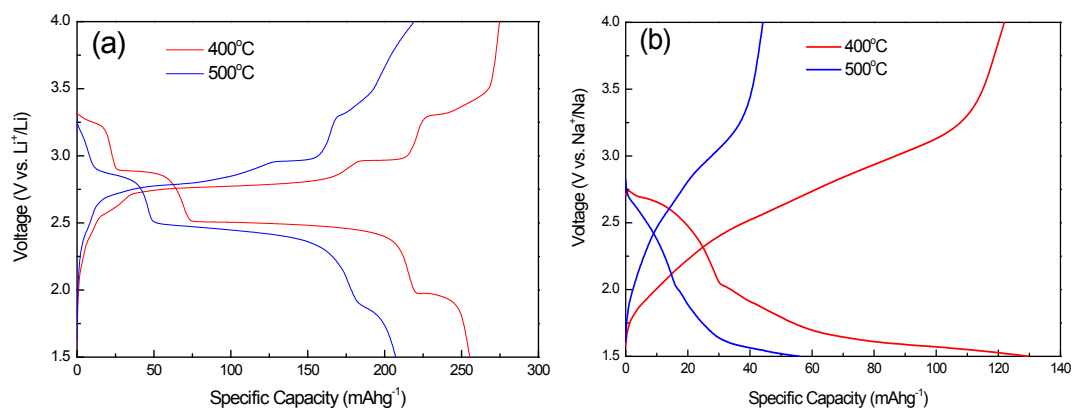

Fig. S2 Charge/discharge performance with Li/Na of NaV<sub>6</sub>O<sub>15</sub> calcined at 400 °C (a) and 500 °C (b), respectively.
